# Supplementary material for: Naphthazarin Derivatives in the Light of Intra- and Intermolecular Forces
Source: MDPI journal article supplement (doi:10.3390/molecules26185642), 2021-09-17
Supplement: s1 [file s1]

## SUPPLEMENTARY INFORMATION

### Naphthazarin derivatives in the light of intra- and intermolecular forces

Karol Kułacz<sup>1†</sup>, Michał Pocheć<sup>1†</sup>, Aneta Jezierska<sup>1\*</sup>, Jarosław J. Panek<sup>1\*</sup>

<sup>1</sup> University of Wrocław, Faculty of Chemistry, ul. F. Joliot-Curie 14, 50-383 Wrocław, Poland

<sup>†</sup> These authors contributed equally to this work

#### Table of content:

- I. **Figure S1.** The structures of the investigated naphthazarin derivatives: 2,3-dimethylnaphthazarin (**1**) and 2,3-dimethoxy-6-methylnaphthazarin (**2**) with atoms numbering scheme for hydrogen bridges. Coloring scheme: oxygen atom – red, carbon atom – grey, and hydrogen atom – white.
- II. **Figure S2.** The models for gas phase and solid state CPMD simulations. Left – the isolated molecule model of 2,3-dimethylnaphthazarin (**1**); right – the model used for solid-state simulations of 2,3-dimethoxy-6-methylnaphthazarin (**2**).
- III. **Table S1.** Energy for compounds **1** and **2** with different proton positions in the hydrogen bridges computed using DFT method. Electronic as well as vibrational zero point-corrected values are given.
- IV. **Table S2.** Selected geometric parameters related to the intramolecular hydrogen bonds of 2,3-dimethylnaphthazarin (**1**) and 2,3-dimethoxy-6-methylnaphthazarin (**2**). Comparison of experimental [1, 2] and computed data. Metric parameters are given in Å and degrees. CPMD results are presented as average  $\pm$  standard deviation. For atoms numbering scheme see Figure S1.
- V. **Sets of coordinates** for the minima and transition state estimates from the DFT scans (XYZ format).

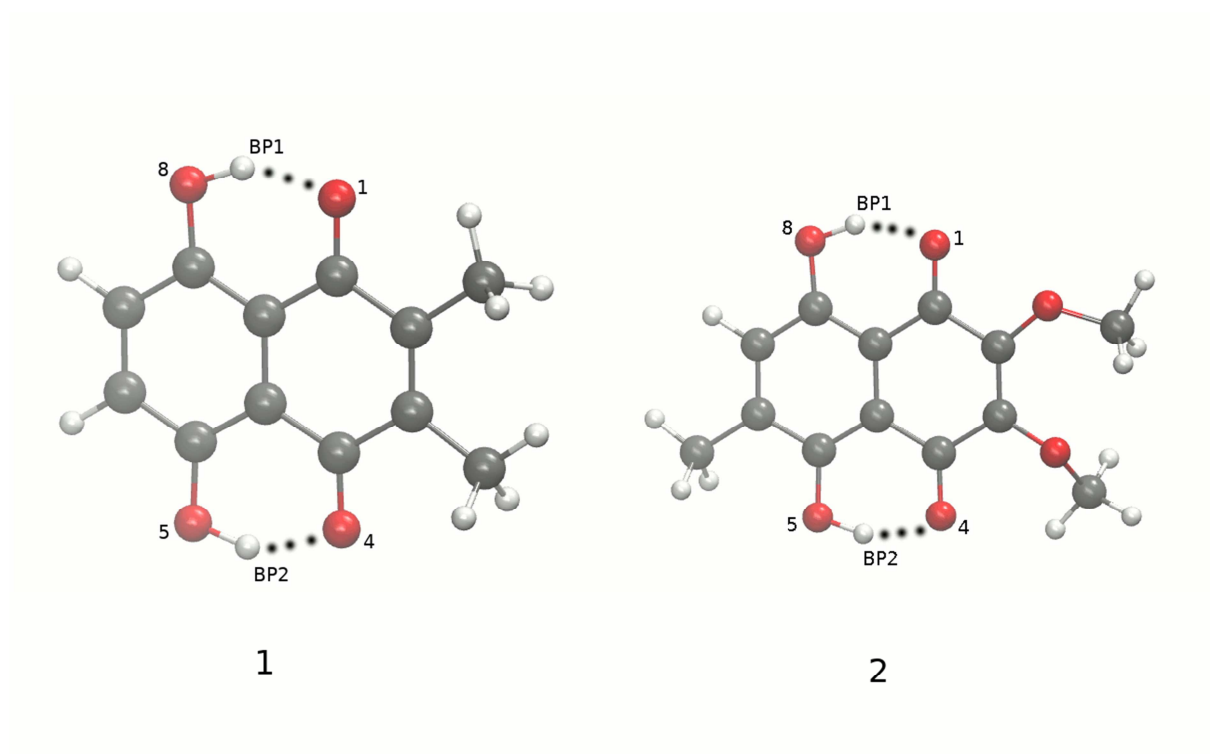

**Figure S1.** The structures of the investigated naphthazarin derivatives: 2,3-dimethylnaphthazarin (**1**) and 2,3-dimethoxy-6-methylnaphthazarin (**2**) with atoms numbering scheme for hydrogen bridges. Coloring scheme: oxygen atom – red, carbon atom – grey and hydrogen atom – white.

**O8-H<sup>BP1</sup>...O1 – Bridge 1**

**O5-H<sup>BP2</sup>...O4 – Bridge 2**

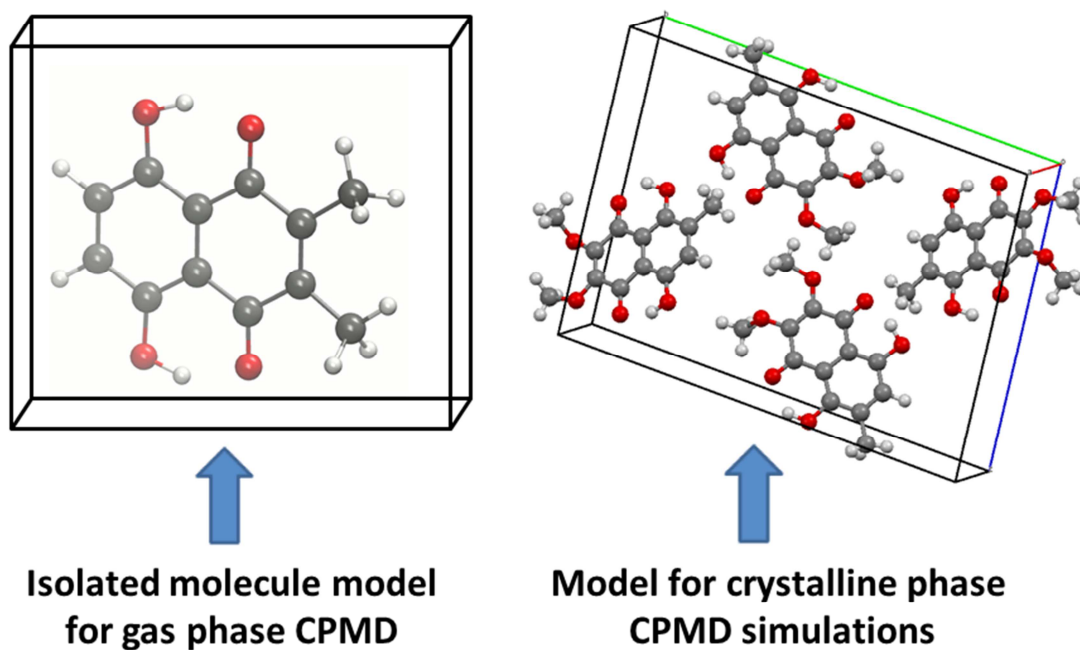

**Figure S2.** The models for gas phase and solid state CPMD simulations. Left – the isolated molecule model of 2,3-dimethylnaphthazarin (**1**); right – the model used for solid-state simulations of 2,3-dimethoxy-6-methylnaphthazarin (**2**).

**Table S1.** Energy for compounds **1** and **2** with different proton positions in the hydrogen bridges computed using DFT method. Electronic as well as vibrational zero point-corrected values are given.

| <b>Compound 1 – electronic energy</b>                                                           |                                                                                     |                                                                                          |
|-------------------------------------------------------------------------------------------------|-------------------------------------------------------------------------------------|------------------------------------------------------------------------------------------|
| <b>Molecular form</b>                                                                           | 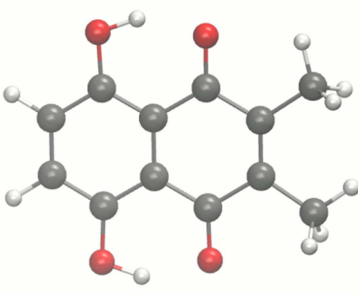   | <b>Energy [kcal/mol]</b>                                                                 |
|                                                                                                 |                                                                                     | <b>B3LYP = -479702.5025</b><br><b>PBE = -479148.6994</b><br><b>ωB97XD = -479538.1104</b> |
| <b>Proton on the donor side in the Bridge 1 and proton on the acceptor side in the Bridge 2</b> |   | <b>B3LYP = -479697.1997</b><br><b>PBE = -479145.8773</b><br><b>ωB97XD = -479531.296</b>  |
| <b>Proton-transferred form</b>                                                                  |  | <b>B3LYP = -479700.5659</b><br><b>PBE = -479147.0874</b><br><b>ωB97XD = -479536.0907</b> |

\* Basis set used for the simulations: 6-311++G(2d,2p)

\*O8-H<sup>BP1</sup>...O1 – Bridge 1

O5-H<sup>BP2</sup>...O4 – Bridge 2

**Table S1 Continuation.** Energy for compounds **1** and **2** with different proton positions in the hydrogen bridges computed using DFT method. Electronic as well as vibrational zero point-corrected values are given.

| <b>Compound 1 – electronic energy with correction for vibrational zero point energy (ZPE) included</b> |                                                                                     |                                                                                          |
|--------------------------------------------------------------------------------------------------------|-------------------------------------------------------------------------------------|------------------------------------------------------------------------------------------|
| <b>Molecular form</b>                                                                                  | 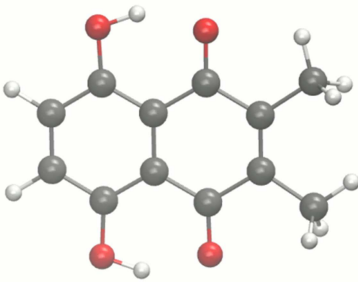   | <b>Energy+ZPE [kcal/mol]</b>                                                             |
|                                                                                                        |                                                                                     | <b>B3LYP = -479578.7114</b><br><b>PBE = -479028.9699</b><br><b>ωB97XD = -479412.1866</b> |
| <b>Proton on the donor side in the Bridge 1 and proton on the acceptor side in the Bridge 2</b>        |   | <b>B3LYP = -479574.0566</b><br><b>PBE = -479027.7105</b><br><b>ωB97XD = -479405.9611</b> |
| <b>Proton-transferred form</b>                                                                         |  | <b>B3LYP = -479576.8051</b><br><b>PBE = -479027.5938</b><br><b>ωB97XD = -479410.6442</b> |

\* Basis set used for the simulations: 6-311++G(2d,2p)

\*O8-H<sup>BP1</sup>...O1 – Bridge 1

O5-H<sup>BP2</sup>...O4 – Bridge 2

**Table S1 Continuation.** Energy for compounds **1** and **2** with different proton positions in the hydrogen bridges computed using DFT method. Electronic as well as vibrational zero point-corrected values are given.

| <b>Compound 2 – electronic energy</b>                                                           |                                                                                      |                                                                                           |
|-------------------------------------------------------------------------------------------------|--------------------------------------------------------------------------------------|-------------------------------------------------------------------------------------------|
| <b>Molecular form</b>                                                                           | 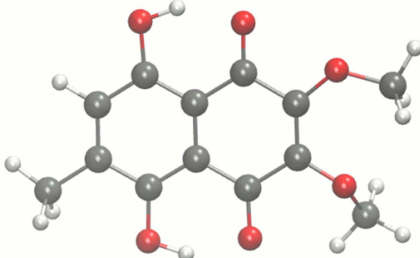   | <b>Energy [kcal/mol]</b>                                                                  |
|                                                                                                 |                                                                                      | <b>B3LYP = -598790.8323</b><br><b>PBE = -598112.0786</b><br><b>ωB97XD = -598588.4445</b>  |
| <b>Proton on the acceptor side in the Bridge 1 and proton on the donor side in the Bridge 2</b> |   | <b>B3LYP = -598785.446</b><br><b>*PBE = -598112.0787</b><br><b>ωB97XD = -598581.7599</b>  |
| <b>Proton on the donor side in the Bridge 1 and proton on the acceptor side in the Bridge 2</b> |  | <b>B3LYP = -598785.2588</b><br><b>*PBE = -598112.0787</b><br><b>ωB97XD = -598581.4126</b> |
| <b>Proton-transferred form</b>                                                                  |  | <b>B3LYP = -598787.8919</b><br><b>PBE = -598109.3002</b><br><b>ωB97XD = -598585.5316</b>  |

\* Basis set used for the simulations: 6-311++G(2d,2p)

\*O8-H<sup>BP1</sup>...O1 – Bridge 1

O5-H<sup>BP2</sup>...O4 – Bridge 2

\* in case of PBE functional the molecular form was obtained

**Table S1 Continuation.** Energy for compounds **1** and **2** with different proton positions in the hydrogen bridges computed using DFT method. Electronic as well as vibrational zero point-corrected values are given.

| <b>Compound 2 – electronic energy with correction for vibrational zero point energy (ZPE) included</b> |                                                                                      |                                                                                           |
|--------------------------------------------------------------------------------------------------------|--------------------------------------------------------------------------------------|-------------------------------------------------------------------------------------------|
| <b>Molecular form</b>                                                                                  | 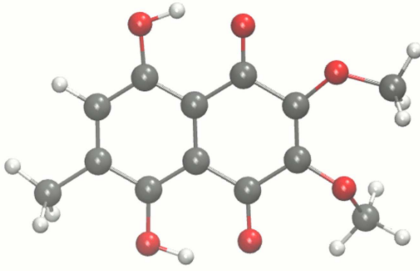   | <b>Energy+ZPE [kcal/mol]</b>                                                              |
|                                                                                                        |                                                                                      | <b>B3LYP = -598643.6520</b><br><b>PBE = -597969.6629</b><br><b>ωB97XD = -598438.8419</b>  |
| <b>Proton on the acceptor side in the Bridge 1 and proton on the donor side in the Bridge 2</b>        |   | <b>B3LYP = -598638.9652</b><br><b>*PBE = -597969.6648</b><br><b>ωB97XD = -598432.6371</b> |
| <b>Proton on the donor side in the Bridge 1 and proton on the acceptor side in the Bridge 2</b>        |  | <b>B3LYP = -598638.9011</b><br><b>*PBE = -597969.6642</b><br><b>ωB97XD = -598432.5104</b> |
| <b>Proton-transferred form</b>                                                                         |  | <b>B3LYP = -598640.9079</b><br><b>PBE = -597967.3776</b><br><b>ωB97XD = -598436.2578</b>  |

\* Basis set used for the simulations: 6-311++G(2d,2p)

\*O8-H<sup>BP1</sup>...O1 – Bridge 1

O5-H<sup>BP2</sup>...O4 – Bridge 2

\* in case of PBE functional the molecular form was obtained

**Table S2.** Selected geometric parameters related to the intramolecular hydrogen bonds of 2,3-dimethylnaphthazarin (**1**) and 2,3-dimethoxy-6-methylnaphthazarin (**2**). Comparison of experimental [1, 2] and computed data. Metric parameters are given in Å and degrees. CPMD results are presented as average  $\pm$  standard deviation. For atoms numbering scheme see Figure S1.

| Metric parameters                          | Experimental<br>X-ray | Computational methods |        |       |                     |                       |
|--------------------------------------------|-----------------------|-----------------------|--------|-------|---------------------|-----------------------|
|                                            |                       | B3LYP                 | ωB97XD | PBE   | CPMD<br>(gas phase) | CPMD<br>(solid state) |
| 2,3-dimethylnaphthazarin (1) [1]           |                       |                       |        |       |                     |                       |
| O8...O1                                    | 2.605                 | 2.564                 | 2.573  | 2.525 | 2.537 ± 0.087       | 2.555 ± 0.092         |
| O8-H <sup>BP1</sup>                        | 0.740                 | 0.990                 | 0.981  | 1.022 | 1.087 ± 0.162       | 1.084 ± 0.174         |
| H <sup>BP1</sup> ...O1                     | 1.984                 | 1.675                 | 1.700  | 1.576 | 1.538 ± 0.206       | 1.580 ± 0.228         |
| <O8H <sup>BP1</sup> O1                     | 141.5                 | 147.2                 | 146.0  | 152.1 | 150.28 ± 6.25       | 146.95 ± 7.10         |
| O5...O4                                    | –                     | 2.569                 | 2.577  | 2.528 | 2.541 ± 0.090       | 2.557 ± 0.089         |
| O5-H <sup>BP2</sup>                        | –                     | 0.990                 | 0.981  | 1.023 | 1.086 ± 0.167       | 1.089 ± 0.181         |
| H <sup>BP2</sup> ...O4                     | –                     | 1.679                 | 1.704  | 1.577 | 1.542 ± 0.206       | 1.575 ± 0.227         |
| <O5H <sup>BP2</sup> O4                     | –                     | 147.3                 | 146.1  | 152.2 | 150.24 ± 6.30       | 147.40 ± 6.93         |
| 2,3-dimethoxy-6-methylnaphthazarin (2) [2] |                       |                       |        |       |                     |                       |
| O8...O1                                    | 2.589                 | 2.573                 | 2.583  | 2.534 | 2.549 ± 0.090       | 2.484 ± 0.080         |
| O8-H <sup>BP1</sup>                        | 1.025                 | 0.990                 | 0.981  | 1.021 | 1.076 ± 0.156       | 1.322 ± 0.230         |
| H <sup>BP1</sup> ...O1                     | 1.796                 | 1.684                 | 1.711  | 1.587 | 1.563 ± 0.201       | 1.229 ± 0.210         |
| <O8H <sup>BP1</sup> O1                     | 131.3                 | 147.2                 | 146.0  | 152.0 | 150.01 ± 6.41       | 153.86 ± 5.65         |
| O5...O4                                    | 2.551                 | 2.554                 | 2.564  | 2.518 | 2.528 ± 0.086       | 2.470 ± 0.079         |
| O5-H <sup>BP2</sup>                        | 1.018                 | 0.992                 | 0.982  | 1.024 | 1.080 ± 0.156       | 1.241 ± 0.205         |
| H <sup>BP2</sup> ...O4                     | 1.590                 | 1.657                 | 1.684  | 1.564 | 1.531 ±0.189        | 1.307 ±0.245          |
| <O5H <sup>BP2</sup> O4                     | 155.3                 | 148.2                 | 147.0  | 152.8 | 150.96 ± 6.06       | 152.00 ± 6.49         |

\*static DFT simulations were performed with 6-311++G(2d,2p) basis set, "–" lack of bridged proton in the molecule.

\*O8-H<sup>BP1</sup>...O1 – Bridge 1

O5-H<sup>BP2</sup>...O4 – Bridge 2



**Sets of coordinates** for the minima and transition state estimates from the DFT scans (XYZ format).

**The geometry was obtained using the Gaussian 16 Rev. A.03 suite of programs [3].**

**The 6-311++G(2d,2p) basis set was used during the QM simulations.**

### **Compound I (B3LYP functional)**

#### **Geometry for the first minimum:**

26

compound 1

|   |           |           |           |
|---|-----------|-----------|-----------|
| 6 | -2.998324 | 0.673202  | -0.000034 |
| 6 | -2.993098 | -0.696480 | -0.000096 |
| 6 | -1.775874 | -1.413791 | 0.000033  |
| 6 | -0.565964 | -0.708616 | -0.000052 |
| 6 | -0.570265 | 0.708914  | -0.000014 |
| 6 | -1.787646 | 1.402152  | 0.000142  |
| 6 | 0.689564  | 1.441247  | -0.000149 |
| 6 | 1.971813  | 0.689409  | -0.000305 |
| 6 | 1.970747  | -0.666079 | -0.000185 |
| 6 | 0.699107  | -1.427692 | -0.000272 |
| 8 | -1.834112 | -2.749503 | 0.000138  |
| 8 | 0.733473  | -2.671350 | -0.000265 |
| 6 | 3.214578  | -1.503480 | 0.000477  |
| 6 | 3.231228  | 1.513788  | -0.000190 |
| 8 | 0.701688  | 2.685131  | -0.000045 |
| 8 | -1.861914 | 2.736932  | 0.000296  |
| 1 | -3.915925 | -1.258968 | -0.000228 |
| 1 | -3.925599 | 1.228251  | -0.000132 |
| 1 | 3.225874  | -2.164255 | -0.867393 |
| 1 | 3.229154  | -2.157699 | 0.873371  |
| 1 | 4.116539  | -0.900754 | -0.003189 |
| 1 | 3.842833  | 1.297077  | -0.876904 |
| 1 | 3.838839  | 1.302658  | 0.880729  |
| 1 | 2.986387  | 2.570902  | -0.003872 |
| 1 | -0.929036 | 3.068221  | 0.000299  |
| 1 | -0.897334 | -3.070567 | 0.000195  |

### **Geometry for the transition state:**

26

compound 1

|   |           |           |           |
|---|-----------|-----------|-----------|
| 6 | -2.985253 | 0.749965  | 0.000009  |
| 6 | -3.009032 | -0.611880 | -0.000014 |
| 6 | -1.801620 | -1.377374 | -0.000031 |
| 6 | -0.573954 | -0.721280 | 0.000005  |
| 6 | -0.545310 | 0.693419  | 0.000028  |
| 6 | -1.734593 | 1.463612  | 0.000025  |
| 6 | 0.678503  | 1.387231  | 0.000016  |
| 6 | 1.949629  | 0.661009  | -0.000007 |
| 6 | 1.940784  | -0.703224 | 0.000114  |
| 6 | 0.669582  | -1.461578 | 0.000030  |
| 8 | -1.898760 | -2.705019 | -0.000074 |
| 8 | 0.680162  | -2.710749 | -0.000030 |
| 6 | 3.183359  | -1.541086 | 0.000147  |
| 6 | 3.216972  | 1.476223  | -0.000191 |
| 8 | 0.677104  | 2.674279  | 0.000019  |
| 8 | -1.684362 | 2.744286  | 0.000047  |
| 1 | -3.944326 | -1.154509 | -0.000035 |
| 1 | -3.898149 | 1.328350  | 0.000008  |
| 1 | 3.195107  | -2.197629 | -0.871274 |
| 1 | 3.192607  | -2.201162 | 0.868874  |
| 1 | 4.088080  | -0.942331 | 0.002564  |
| 1 | 3.825100  | 1.255990  | -0.878307 |
| 1 | 3.823901  | 1.258169  | 0.879328  |
| 1 | 2.987040  | 2.536685  | -0.001579 |
| 1 | -0.432087 | 3.053795  | 0.000023  |
| 1 | -0.964823 | -3.049959 | -0.000082 |

### **Geometry for the second minimum:**

26

compound 1

|   |           |           |           |
|---|-----------|-----------|-----------|
| 6 | -3.013066 | 0.722434  | 0.000004  |
| 6 | -3.015599 | -0.630188 | -0.000022 |
| 6 | -1.785444 | -1.375660 | -0.000023 |
| 6 | -0.563582 | -0.708116 | 0.000017  |
| 6 | -0.542358 | 0.715138  | 0.000035  |
| 6 | -1.767193 | 1.480741  | 0.000034  |
| 6 | 0.683155  | 1.372526  | 0.000010  |
| 6 | 1.938199  | 0.647609  | -0.000013 |
| 6 | 1.940833  | -0.720176 | 0.000054  |
| 6 | 0.669724  | -1.462515 | 0.000017  |
| 8 | -1.865483 | -2.695797 | -0.000065 |
| 8 | 0.653171  | -2.719213 | -0.000017 |
| 6 | 3.203401  | -1.537573 | 0.000110  |
| 6 | 3.191807  | 1.476501  | -0.000131 |
| 8 | 0.756421  | 2.692434  | -0.000004 |
| 8 | -1.766419 | 2.735483  | 0.000052  |
| 1 | -3.937708 | -1.195302 | -0.000045 |
| 1 | -3.932026 | 1.291430  | 0.000005  |
| 1 | 2.957837  | -2.594874 | 0.001006  |
| 1 | 3.814118  | -1.324113 | 0.878685  |
| 1 | 3.813306  | -1.325490 | -0.879371 |
| 1 | 3.216243  | 2.131645  | -0.872131 |
| 1 | 4.085962  | 0.862795  | -0.000613 |
| 1 | 3.216808  | 2.131120  | 0.872246  |
| 1 | -0.184016 | 3.058106  | 0.000003  |
| 1 | -0.911309 | -3.022901 | -0.000068 |

## Compound I (ωB97XD functional)

### Geometry for the first minimum:

26

compound 1

|   |           |           |           |
|---|-----------|-----------|-----------|
| 6 | -2.990756 | 0.669212  | -0.000104 |
| 6 | -2.985034 | -0.694758 | -0.000046 |
| 6 | -1.770011 | -1.411999 | 0.000085  |
| 6 | -0.569670 | -0.707905 | 0.000004  |
| 6 | -0.574500 | 0.708096  | -0.000013 |
| 6 | -1.782972 | 1.399205  | -0.000019 |
| 6 | 0.687288  | 1.440128  | -0.000078 |
| 6 | 1.971655  | 0.686063  | -0.000108 |
| 6 | 1.970931  | -0.660076 | -0.000215 |
| 6 | 0.698047  | -1.425235 | -0.000132 |
| 8 | -1.836983 | -2.742540 | 0.000358  |
| 8 | 0.738870  | -2.657383 | -0.000372 |
| 6 | 3.210901  | -1.497549 | 0.000037  |
| 6 | 3.228574  | 1.507920  | 0.000121  |
| 8 | 0.704508  | 2.672459  | 0.000169  |
| 8 | -1.867519 | 2.728635  | -0.000059 |
| 1 | -3.908145 | -1.257113 | -0.000038 |
| 1 | -3.918747 | 1.223469  | -0.000175 |
| 1 | 3.219434  | -2.155275 | -0.869562 |
| 1 | 3.222802  | -2.149538 | 0.873981  |
| 1 | 4.113216  | -0.894333 | -0.003479 |
| 1 | 3.835307  | 1.289804  | -0.879201 |
| 1 | 3.833963  | 1.291229  | 0.880743  |
| 1 | 2.986258  | 2.566051  | -0.000873 |
| 1 | -0.948494 | 3.071104  | -0.000053 |
| 1 | -0.913321 | -3.073393 | 0.000690  |

### **Geometry for the transition state:**

26

compound 1

|   |           |           |           |
|---|-----------|-----------|-----------|
| 6 | -2.975593 | 0.754823  | -0.000040 |
| 6 | -3.001920 | -0.599760 | -0.000153 |
| 6 | -1.796926 | -1.372929 | -0.000120 |
| 6 | -0.578094 | -0.724752 | 0.000083  |
| 6 | -0.545552 | 0.691652  | 0.000162  |
| 6 | -1.721916 | 1.464618  | 0.000095  |
| 6 | 0.672436  | 1.383445  | 0.000115  |
| 6 | 1.947711  | 0.653880  | 0.000006  |
| 6 | 1.938599  | -0.699811 | 0.000626  |
| 6 | 0.665204  | -1.463874 | 0.000292  |
| 8 | -1.912921 | -2.694466 | -0.000353 |
| 8 | 0.683765  | -2.701127 | 0.000030  |
| 6 | 3.177188  | -1.538131 | 0.000448  |
| 6 | 3.211843  | 1.467298  | -0.000808 |
| 8 | 0.678152  | 2.658708  | 0.000138  |
| 8 | -1.670406 | 2.738559  | 0.000158  |
| 1 | -3.939240 | -1.139475 | -0.000301 |
| 1 | -3.887311 | 1.335499  | -0.000080 |
| 1 | 3.191600  | -2.182837 | -0.879173 |
| 1 | 3.177213  | -2.204635 | 0.863518  |
| 1 | 4.082447  | -0.939358 | 0.014796  |
| 1 | 3.817350  | 1.242681  | -0.879175 |
| 1 | 3.814799  | 1.248233  | 0.880781  |
| 1 | 2.982516  | 2.528352  | -0.004279 |
| 1 | -0.429362 | 3.055040  | 0.000248  |
| 1 | -0.996635 | -3.055648 | -0.000358 |

### **Geometry for the second minimum:**

26

compound 1

|   |           |           |           |
|---|-----------|-----------|-----------|
| 6 | -3.016391 | 0.690161  | 0.000060  |
| 6 | -3.003621 | -0.653796 | 0.000051  |
| 6 | -1.760695 | -1.387238 | 0.000037  |
| 6 | -0.557742 | -0.710189 | -0.000012 |
| 6 | -0.546153 | 0.717065  | -0.000026 |
| 6 | -1.776252 | 1.466329  | -0.000025 |
| 6 | 0.662807  | 1.385729  | 0.000006  |
| 6 | 1.931870  | 0.669267  | 0.000027  |
| 6 | 1.939054  | -0.688279 | -0.000011 |
| 6 | 0.679232  | -1.448365 | -0.000027 |
| 8 | -1.836492 | -2.701434 | 0.000004  |
| 8 | 0.694714  | -2.694219 | -0.000049 |
| 6 | 3.185374  | -1.515448 | -0.000027 |
| 6 | 3.199734  | 1.480891  | 0.000062  |
| 8 | 0.723545  | 2.699005  | 0.000034  |
| 8 | -1.798387 | 2.710419  | -0.000108 |
| 1 | -3.918907 | -1.230306 | 0.000090  |
| 1 | -3.941273 | 1.249965  | 0.000120  |
| 1 | 3.197057  | -2.171646 | -0.871103 |
| 1 | 3.197544  | -2.170967 | 0.871551  |
| 1 | 4.087121  | -0.911354 | -0.000499 |
| 1 | 3.802503  | 1.253540  | -0.879443 |
| 1 | 3.802122  | 1.254038  | 0.879959  |
| 1 | 2.983880  | 2.543941  | -0.000280 |
| 1 | -0.206536 | 3.064528  | -0.000155 |
| 1 | -0.893854 | -3.028677 | 0.000025  |

## Compound I (PBE functional)

### Geometry for the first minimum:

26

compound 1

|   |           |           |           |
|---|-----------|-----------|-----------|
| 6 | -3.010568 | 0.676664  | 0.000211  |
| 6 | -3.005215 | -0.700831 | 0.000210  |
| 6 | -1.779456 | -1.421204 | -0.000013 |
| 6 | -0.560547 | -0.708563 | -0.000192 |
| 6 | -0.564948 | 0.708941  | -0.000181 |
| 6 | -1.791584 | 1.409037  | -0.000015 |
| 6 | 0.687559  | 1.443732  | -0.000268 |
| 6 | 1.966570  | 0.697095  | -0.000249 |
| 6 | 1.966087  | -0.674357 | -0.000279 |
| 6 | 0.697176  | -1.430729 | -0.000240 |
| 8 | -1.809409 | -2.756757 | -0.000057 |
| 8 | 0.718351  | -2.695624 | 0.000165  |
| 6 | 3.212869  | -1.505675 | 0.000138  |
| 6 | 3.225879  | 1.518859  | 0.000051  |
| 8 | 0.687002  | 2.708735  | 0.000347  |
| 8 | -1.838239 | 2.744042  | -0.000112 |
| 1 | -3.935613 | -1.268345 | 0.000341  |
| 1 | -3.945562 | 1.236565  | 0.000338  |
| 1 | 3.224788  | -2.175220 | -0.872200 |
| 1 | 3.229066  | -2.167792 | 0.878153  |
| 1 | 4.120970  | -0.896344 | -0.004318 |
| 1 | 3.843592  | 1.301501  | -0.883080 |
| 1 | 3.840703  | 1.305050  | 0.886107  |
| 1 | 2.977357  | 2.584948  | -0.002301 |
| 1 | -0.856312 | 3.029186  | -0.000472 |
| 1 | -0.823569 | -3.030523 | -0.000347 |

### **Geometry for the transition state:**

26

compound 1

|   |           |           |           |
|---|-----------|-----------|-----------|
| 6 | -3.006984 | 0.720217  | 0.000006  |
| 6 | -3.016139 | -0.650903 | 0.000054  |
| 6 | -1.792443 | -1.398806 | -0.000156 |
| 6 | -0.562808 | -0.714490 | 0.000095  |
| 6 | -0.550158 | 0.699400  | 0.000041  |
| 6 | -1.762556 | 1.456301  | -0.000370 |
| 6 | 0.678205  | 1.400659  | 0.000126  |
| 6 | 1.946837  | 0.681726  | -0.000023 |
| 6 | 1.944067  | -0.698560 | 0.000039  |
| 6 | 0.679311  | -1.451310 | 0.000161  |
| 8 | -1.837099 | -2.727373 | -0.000093 |
| 8 | 0.678802  | -2.722917 | 0.000116  |
| 6 | 3.192592  | -1.526365 | -0.000000 |
| 6 | 3.213065  | 1.496791  | -0.000368 |
| 8 | 0.667541  | 2.705814  | 0.000458  |
| 8 | -1.730077 | 2.744780  | -0.000018 |
| 1 | -3.952063 | -1.210580 | 0.000116  |
| 1 | -3.934433 | 1.292863  | 0.000057  |
| 1 | 3.206149  | -2.194047 | -0.874016 |
| 1 | 3.207848  | -2.191357 | 0.876079  |
| 1 | 4.101355  | -0.917934 | -0.001688 |
| 1 | 3.827182  | 1.275998  | -0.884997 |
| 1 | 3.827473  | 1.276241  | 0.884157  |
| 1 | 2.981196  | 2.566236  | -0.000321 |
| 1 | -0.436605 | 3.020300  | -0.000428 |
| 1 | -0.839373 | -3.008113 | -0.000295 |



### **Geometry for the second minimum:**

26

compound 1

|   |           |           |           |
|---|-----------|-----------|-----------|
| 6 | -3.020445 | 0.709012  | -0.000029 |
| 6 | -3.021832 | -0.657907 | -0.000048 |
| 6 | -1.789132 | -1.397838 | -0.000022 |
| 6 | -0.560843 | -0.708424 | 0.000012  |
| 6 | -0.551183 | 0.708713  | 0.000034  |
| 6 | -1.777946 | 1.464710  | 0.000023  |
| 6 | 0.678517  | 1.396201  | 0.000018  |
| 6 | 1.935703  | 0.676097  | -0.000047 |
| 6 | 1.937247  | -0.706588 | 0.000023  |
| 6 | 0.675725  | -1.454094 | 0.000025  |
| 8 | -1.826233 | -2.721869 | -0.000056 |
| 8 | 0.658356  | -2.730216 | 0.000016  |
| 6 | 3.213640  | -1.492816 | 0.000101  |
| 6 | 3.217979  | 1.459924  | -0.000167 |
| 8 | 0.695207  | 2.717092  | 0.000053  |
| 8 | -1.767344 | 2.740997  | 0.000065  |
| 1 | -3.952423 | -1.226630 | -0.000087 |
| 1 | -3.949952 | 1.278559  | -0.000043 |
| 1 | 2.998232  | -2.566108 | 0.000063  |
| 1 | 3.827049  | -1.254058 | 0.882409  |
| 1 | 3.827284  | -1.253938 | -0.881981 |
| 1 | 3.827559  | 1.212843  | -0.882267 |
| 1 | 3.827837  | 1.212752  | 0.881712  |
| 1 | 3.025455  | 2.536741  | -0.000112 |
| 1 | -0.322432 | 3.024651  | 0.000163  |
| 1 | -0.813082 | -2.994785 | -0.000017 |

## Compound II – scan 1 (B3LYP functional)

### Geometry for the first minimum:

31

compound 2

|   |           |           |           |
|---|-----------|-----------|-----------|
| 6 | -0.601404 | 1.587314  | -0.040069 |
| 8 | -0.713118 | 2.818773  | 0.006208  |
| 6 | -1.833650 | 0.741433  | -0.115846 |
| 8 | -2.929152 | 1.499687  | -0.152169 |
| 6 | -4.255422 | 0.977961  | 0.013680  |
| 1 | -4.541304 | 0.350120  | -0.824117 |
| 1 | -4.336525 | 0.417106  | 0.943387  |
| 1 | -4.888175 | 1.859072  | 0.061891  |
| 6 | -1.739679 | -0.621147 | -0.159376 |
| 8 | -2.848524 | -1.391592 | -0.345876 |
| 6 | -3.167503 | -2.352852 | 0.676277  |
| 1 | -2.368306 | -3.078178 | 0.793801  |
| 1 | -3.362114 | -1.843610 | 1.623238  |
| 1 | -4.072973 | -2.848296 | 0.337878  |
| 6 | -0.428098 | -1.290066 | -0.158322 |
| 8 | -0.370622 | -2.530965 | -0.253141 |
| 6 | 2.035240  | -1.103869 | -0.041652 |
| 8 | 2.177458  | -2.434058 | -0.106616 |
| 1 | 1.261664  | -2.806859 | -0.185966 |
| 6 | 3.224612  | -0.323686 | 0.050437  |
| 6 | 4.553291  | -1.020306 | 0.076128  |
| 1 | 5.367690  | -0.303186 | 0.149330  |
| 1 | 4.613386  | -1.709559 | 0.919521  |
| 1 | 4.692641  | -1.621536 | -0.823366 |
| 6 | 3.113528  | 1.044661  | 0.107759  |
| 1 | 3.997410  | 1.663894  | 0.175580  |
| 6 | 1.861172  | 1.693985  | 0.077152  |
| 8 | 1.847965  | 3.029987  | 0.131535  |
| 1 | 0.897304  | 3.303344  | 0.097950  |
| 6 | 0.784337  | -0.482808 | -0.063314 |
| 6 | 0.691450  | 0.929884  | -0.007631 |

### **Geometry for the transition state:**

31

compound 2

|   |           |           |           |
|---|-----------|-----------|-----------|
| 6 | -0.572666 | 1.540845  | -0.059435 |
| 8 | -0.651323 | 2.818568  | -0.019907 |
| 6 | -1.803204 | 0.739449  | -0.129716 |
| 8 | -2.902135 | 1.500397  | -0.174918 |
| 6 | -4.207618 | 0.997370  | 0.143540  |
| 1 | -4.584359 | 0.348965  | -0.640902 |
| 1 | -4.192982 | 0.463429  | 1.092911  |
| 1 | -4.826865 | 1.884893  | 0.233482  |
| 6 | -1.720971 | -0.632450 | -0.173399 |
| 8 | -2.845047 | -1.371318 | -0.378937 |
| 6 | -3.174195 | -2.380918 | 0.593812  |
| 1 | -2.393226 | -3.131806 | 0.655785  |
| 1 | -3.338123 | -1.919862 | 1.570609  |
| 1 | -4.099685 | -2.829126 | 0.244126  |
| 6 | -0.419348 | -1.319886 | -0.153451 |
| 8 | -0.353733 | -2.566286 | -0.237572 |
| 6 | 2.038040  | -1.096432 | -0.026155 |
| 8 | 2.200401  | -2.418523 | -0.079975 |
| 1 | 1.284202  | -2.803885 | -0.158889 |
| 6 | 3.226406  | -0.281739 | 0.065351  |
| 6 | 4.560136  | -0.968179 | 0.103218  |
| 1 | 5.367990  | -0.243815 | 0.173979  |
| 1 | 4.620842  | -1.649801 | 0.952749  |
| 1 | 4.707648  | -1.575991 | -0.790539 |
| 6 | 3.103025  | 1.078496  | 0.109269  |
| 1 | 3.978645  | 1.709562  | 0.176052  |
| 6 | 1.821729  | 1.726412  | 0.065603  |
| 8 | 1.702861  | 3.002349  | 0.101158  |
| 1 | 0.438667  | 3.251497  | 0.044605  |
| 6 | 0.780001  | -0.508524 | -0.058677 |
| 6 | 0.673508  | 0.901298  | -0.018753 |

### **Geometry for the second minimum:**

31

compound 2

|   |           |           |           |
|---|-----------|-----------|-----------|
| 6 | -0.581492 | 1.539796  | -0.071011 |
| 8 | -0.733145 | 2.848090  | -0.039924 |
| 6 | -1.796514 | 0.739538  | -0.139336 |
| 8 | -2.907422 | 1.487779  | -0.193535 |
| 6 | -4.187369 | 0.989997  | 0.222309  |
| 1 | -4.613706 | 0.324368  | -0.521249 |
| 1 | -4.107274 | 0.476089  | 1.179687  |
| 1 | -4.802834 | 1.877661  | 0.335438  |
| 6 | -1.715743 | -0.635160 | -0.180954 |
| 8 | -2.843101 | -1.365463 | -0.393411 |
| 6 | -3.165471 | -2.403571 | 0.551560  |
| 1 | -2.394777 | -3.167069 | 0.569005  |
| 1 | -3.298354 | -1.974860 | 1.547534  |
| 1 | -4.106642 | -2.823730 | 0.208882  |
| 6 | -0.419022 | -1.306995 | -0.150928 |
| 8 | -0.338356 | -2.561063 | -0.229444 |
| 6 | 2.019210  | -1.088871 | -0.021119 |
| 8 | 2.156744  | -2.404366 | -0.072576 |
| 1 | 1.217218  | -2.770653 | -0.151266 |
| 6 | 3.233948  | -0.297566 | 0.071993  |
| 6 | 4.549396  | -1.016929 | 0.115203  |
| 1 | 5.373874  | -0.311718 | 0.186795  |
| 1 | 4.590409  | -1.697882 | 0.966351  |
| 1 | 4.684082  | -1.630003 | -0.776894 |
| 6 | 3.132688  | 1.054629  | 0.110955  |
| 1 | 4.015305  | 1.676163  | 0.178358  |
| 6 | 1.857110  | 1.753363  | 0.062042  |
| 8 | 1.801641  | 3.005706  | 0.093583  |
| 1 | 0.183048  | 3.256322  | 0.015271  |
| 6 | 0.767789  | -0.484128 | -0.056518 |
| 6 | 0.666931  | 0.935872  | -0.023438 |

## Compound II – scan 2 (B3LYP functional)

### Geometry for the first minimum:

31

compound 2

|   |           |           |           |
|---|-----------|-----------|-----------|
| 6 | -0.601404 | 1.587314  | -0.040069 |
| 8 | -0.713118 | 2.818773  | 0.006208  |
| 6 | -1.833650 | 0.741433  | -0.115846 |
| 8 | -2.929152 | 1.499687  | -0.152169 |
| 6 | -4.255422 | 0.977961  | 0.013680  |
| 1 | -4.541304 | 0.350120  | -0.824117 |
| 1 | -4.336525 | 0.417106  | 0.943387  |
| 1 | -4.888175 | 1.859072  | 0.061891  |
| 6 | -1.739679 | -0.621147 | -0.159376 |
| 8 | -2.848524 | -1.391592 | -0.345876 |
| 6 | -3.167503 | -2.352852 | 0.676277  |
| 1 | -2.368306 | -3.078178 | 0.793801  |
| 1 | -3.362114 | -1.843610 | 1.623238  |
| 1 | -4.072973 | -2.848296 | 0.337878  |
| 6 | -0.428098 | -1.290066 | -0.158322 |
| 8 | -0.370622 | -2.530965 | -0.253141 |
| 6 | 2.035240  | -1.103869 | -0.041652 |
| 8 | 2.177458  | -2.434058 | -0.106616 |
| 1 | 1.261664  | -2.806859 | -0.185966 |
| 6 | 3.224612  | -0.323686 | 0.050437  |
| 6 | 4.553291  | -1.020306 | 0.076128  |
| 1 | 5.367690  | -0.303186 | 0.149330  |
| 1 | 4.613386  | -1.709559 | 0.919521  |
| 1 | 4.692641  | -1.621536 | -0.823366 |
| 6 | 3.113528  | 1.044661  | 0.107759  |
| 1 | 3.997410  | 1.663894  | 0.175580  |
| 6 | 1.861172  | 1.693985  | 0.077152  |
| 8 | 1.847965  | 3.029987  | 0.131535  |
| 1 | 0.897304  | 3.303344  | 0.097950  |
| 6 | 0.784337  | -0.482808 | -0.063314 |
| 6 | 0.691450  | 0.929884  | -0.007631 |

### **Geometry for the transition state:**

31

compound 2

|   |           |           |           |
|---|-----------|-----------|-----------|
| 6 | -0.601159 | 1.611112  | -0.021433 |
| 8 | -0.713861 | 2.846900  | 0.033687  |
| 6 | -1.820459 | 0.747547  | -0.107135 |
| 8 | -2.926322 | 1.488481  | -0.141884 |
| 6 | -4.253180 | 0.945685  | -0.085013 |
| 1 | -4.465791 | 0.330462  | -0.953580 |
| 1 | -4.396952 | 0.366368  | 0.825251  |
| 1 | -4.900092 | 1.817581  | -0.069558 |
| 6 | -1.710820 | -0.622379 | -0.154945 |
| 8 | -2.809063 | -1.415299 | -0.330986 |
| 6 | -3.123916 | -2.332195 | 0.731607  |
| 1 | -2.306742 | -3.026813 | 0.905489  |
| 1 | -3.354688 | -1.783364 | 1.647708  |
| 1 | -4.004836 | -2.874297 | 0.400099  |
| 6 | -0.398452 | -1.243808 | -0.149008 |
| 8 | -0.302708 | -2.525282 | -0.238403 |
| 6 | 2.008526  | -1.131026 | -0.055138 |
| 8 | 2.057666  | -2.412747 | -0.132077 |
| 1 | 0.830090  | -2.805660 | -0.220373 |
| 6 | 3.222850  | -0.340079 | 0.037161  |
| 6 | 4.537940  | -1.055322 | 0.048175  |
| 1 | 5.367783  | -0.355911 | 0.121825  |
| 1 | 4.586567  | -1.755313 | 0.883673  |
| 1 | 4.655833  | -1.653903 | -0.856384 |
| 6 | 3.117881  | 1.021236  | 0.104719  |
| 1 | 4.004641  | 1.637579  | 0.171096  |
| 6 | 1.860615  | 1.693536  | 0.087755  |
| 8 | 1.860740  | 3.023866  | 0.150601  |
| 1 | 0.906874  | 3.303414  | 0.123840  |
| 6 | 0.768303  | -0.456495 | -0.059928 |
| 6 | 0.682821  | 0.954273  | 0.005418  |

### **Geometry for the second minimum:**

31

compound 2

|   |           |           |           |
|---|-----------|-----------|-----------|
| 6 | -0.617591 | 1.587042  | 0.036144  |
| 8 | -0.726622 | 2.827993  | 0.123425  |
| 6 | -1.827469 | 0.731684  | -0.061877 |
| 8 | -2.949237 | 1.452932  | -0.064718 |
| 6 | -4.218554 | 0.929277  | -0.483437 |
| 1 | -4.127853 | 0.398630  | -1.427495 |
| 1 | -4.642645 | 0.269234  | 0.269057  |
| 1 | -4.847224 | 1.806640  | -0.603338 |
| 6 | -1.705669 | -0.637736 | -0.116279 |
| 8 | -2.804163 | -1.446894 | -0.214313 |
| 6 | -3.102665 | -2.237287 | 0.949444  |
| 1 | -2.281815 | -2.910372 | 1.186923  |
| 1 | -3.317749 | -1.590513 | 1.802775  |
| 1 | -3.986886 | -2.814828 | 0.695424  |
| 6 | -0.399694 | -1.250663 | -0.153577 |
| 8 | -0.357289 | -2.565024 | -0.262897 |
| 6 | 2.044054  | -1.143617 | -0.098716 |
| 8 | 2.146784  | -2.394507 | -0.196735 |
| 1 | 0.619069  | -2.835766 | -0.271998 |
| 6 | 3.246254  | -0.300622 | -0.002424 |
| 6 | 4.575164  | -0.986371 | -0.024971 |
| 1 | 5.391165  | -0.271189 | 0.052228  |
| 1 | 4.648421  | -1.703795 | 0.793710  |
| 1 | 4.690737  | -1.564471 | -0.942973 |
| 6 | 3.110480  | 1.047644  | 0.099264  |
| 1 | 3.978596  | 1.689980  | 0.168641  |
| 6 | 1.828795  | 1.687104  | 0.116077  |
| 8 | 1.799802  | 3.007768  | 0.212316  |
| 1 | 0.827348  | 3.261451  | 0.203584  |
| 6 | 0.766127  | -0.486959 | -0.073994 |
| 6 | 0.663209  | 0.928312  | 0.030485  |

## Compound II – scan 1 (ωB97XD functional)

### Geometry for the first minimum:

31

compound 2

|   |           |           |           |
|---|-----------|-----------|-----------|
| 6 | -0.603110 | 1.581246  | -0.049058 |
| 8 | -0.723532 | 2.800712  | -0.005100 |
| 6 | -1.836335 | 0.730869  | -0.127550 |
| 8 | -2.926040 | 1.484296  | -0.156328 |
| 6 | -4.230443 | 0.948914  | 0.038934  |
| 1 | -4.530149 | 0.318327  | -0.792923 |
| 1 | -4.279481 | 0.382605  | 0.969050  |
| 1 | -4.878070 | 1.817917  | 0.108714  |
| 6 | -1.739948 | -0.621397 | -0.179361 |
| 8 | -2.832181 | -1.403453 | -0.367546 |
| 6 | -3.167928 | -2.287120 | 0.699210  |
| 1 | -2.365703 | -2.996296 | 0.889769  |
| 1 | -3.390285 | -1.717624 | 1.606105  |
| 1 | -4.059669 | -2.818188 | 0.378011  |
| 6 | -0.425062 | -1.291018 | -0.170655 |
| 8 | -0.373470 | -2.520409 | -0.261869 |
| 6 | 2.030013  | -1.101757 | -0.040266 |
| 8 | 2.183931  | -2.425724 | -0.101364 |
| 1 | 1.283618  | -2.809905 | -0.184355 |
| 6 | 3.213992  | -0.319231 | 0.056975  |
| 6 | 4.539134  | -1.016358 | 0.089876  |
| 1 | 5.353961  | -0.300242 | 0.169347  |
| 1 | 4.588947  | -1.705587 | 0.933343  |
| 1 | 4.679452  | -1.614657 | -0.810892 |
| 6 | 3.103071  | 1.042807  | 0.112662  |
| 1 | 3.986913  | 1.662427  | 0.184509  |
| 6 | 1.852203  | 1.691377  | 0.076080  |
| 8 | 1.846737  | 3.022117  | 0.130878  |
| 1 | 0.908810  | 3.305757  | 0.094233  |
| 6 | 0.787877  | -0.483470 | -0.069063 |
| 6 | 0.692885  | 0.927666  | -0.013496 |



### **Geometry for the transition state:**

31

compound 2

|   |           |           |           |
|---|-----------|-----------|-----------|
| 6 | -0.568174 | 1.533021  | -0.066441 |
| 8 | -0.654175 | 2.798924  | -0.026493 |
| 6 | -1.802754 | 0.727771  | -0.141266 |
| 8 | -2.894871 | 1.484541  | -0.177063 |
| 6 | -4.178331 | 0.967697  | 0.157961  |
| 1 | -4.562132 | 0.318196  | -0.623219 |
| 1 | -4.138304 | 0.425746  | 1.103460  |
| 1 | -4.810993 | 1.843542  | 0.268602  |
| 6 | -1.719354 | -0.632846 | -0.193630 |
| 8 | -2.828456 | -1.382428 | -0.401300 |
| 6 | -3.177657 | -2.308685 | 0.625678  |
| 1 | -2.395558 | -3.050244 | 0.767806  |
| 1 | -3.369210 | -1.777920 | 1.562429  |
| 1 | -4.091094 | -2.792603 | 0.291315  |
| 6 | -0.415215 | -1.325130 | -0.166750 |
| 8 | -0.358703 | -2.559826 | -0.246882 |
| 6 | 2.031854  | -1.095228 | -0.026359 |
| 8 | 2.212290  | -2.409943 | -0.076712 |
| 1 | 1.314441  | -2.810128 | -0.158821 |
| 6 | 3.215680  | -0.272208 | 0.071054  |
| 6 | 4.546388  | -0.957628 | 0.115667  |
| 1 | 5.353939  | -0.233498 | 0.192916  |
| 1 | 4.597273  | -1.639670 | 0.964919  |
| 1 | 4.695056  | -1.562178 | -0.779586 |
| 6 | 3.091324  | 1.080306  | 0.114697  |
| 1 | 3.965611  | 1.713399  | 0.185870  |
| 6 | 1.807069  | 1.723818  | 0.065451  |
| 8 | 1.685666  | 2.992102  | 0.101684  |
| 1 | 0.432530  | 3.248539  | 0.040611  |
| 6 | 0.783043  | -0.515104 | -0.065535 |
| 6 | 0.671866  | 0.895860  | -0.024222 |

### **Geometry for the second minimum:**

31

compound 2

|   |           |           |           |
|---|-----------|-----------|-----------|
| 6 | -0.574551 | 1.531656  | -0.077081 |
| 8 | -0.734742 | 2.829768  | -0.044733 |
| 6 | -1.793314 | 0.726827  | -0.150978 |
| 8 | -2.897008 | 1.471274  | -0.193881 |
| 6 | -4.155682 | 0.959734  | 0.231277  |
| 1 | -4.590028 | 0.300589  | -0.514549 |
| 1 | -4.053479 | 0.429978  | 1.179203  |
| 1 | -4.780948 | 1.836726  | 0.372300  |
| 6 | -1.712558 | -0.636723 | -0.202033 |
| 8 | -2.825541 | -1.377599 | -0.418082 |
| 6 | -3.171597 | -2.326137 | 0.589505  |
| 1 | -2.392567 | -3.075048 | 0.706934  |
| 1 | -3.351354 | -1.816933 | 1.540470  |
| 1 | -4.091453 | -2.795498 | 0.251865  |
| 6 | -0.414632 | -1.314071 | -0.165116 |
| 8 | -0.342027 | -2.556639 | -0.239582 |
| 6 | 2.010875  | -1.087170 | -0.021923 |
| 8 | 2.166375  | -2.394842 | -0.070477 |
| 1 | 1.246152  | -2.775211 | -0.152272 |
| 6 | 3.224451  | -0.287022 | 0.077286  |
| 6 | 4.535619  | -1.007157 | 0.126583  |
| 1 | 5.360754  | -0.303151 | 0.203078  |
| 1 | 4.566807  | -1.687310 | 0.978222  |
| 1 | 4.669904  | -1.618162 | -0.766457 |
| 6 | 3.123397  | 1.057095  | 0.116542  |
| 1 | 4.004983  | 1.680287  | 0.188146  |
| 6 | 1.842844  | 1.751873  | 0.062850  |
| 8 | 1.778646  | 2.994131  | 0.095350  |
| 1 | 0.170624  | 3.251237  | 0.012311  |
| 6 | 0.768487  | -0.491921 | -0.063496 |
| 6 | 0.662492  | 0.930308  | -0.028083 |

## Compound II – scan 2 (ωB97XD functional)

### Geometry for the first minimum:

31

compound 2

|   |           |           |           |
|---|-----------|-----------|-----------|
| 6 | -0.603130 | 1.581240  | -0.049060 |
| 8 | -0.723565 | 2.800707  | -0.005102 |
| 6 | -1.836347 | 0.730852  | -0.127551 |
| 8 | -2.926060 | 1.484268  | -0.156329 |
| 6 | -4.230457 | 0.948872  | 0.038934  |
| 1 | -4.530157 | 0.318282  | -0.792923 |
| 1 | -4.279489 | 0.382562  | 0.969050  |
| 1 | -4.878093 | 1.817869  | 0.108714  |
| 6 | -1.739943 | -0.621412 | -0.179361 |
| 8 | -2.832167 | -1.403481 | -0.367545 |
| 6 | -3.167903 | -2.287151 | 0.699211  |
| 1 | -2.365670 | -2.996317 | 0.889770  |
| 1 | -3.390267 | -1.717657 | 1.606106  |
| 1 | -4.059639 | -2.818230 | 0.378013  |
| 6 | -0.425050 | -1.291019 | -0.170656 |
| 8 | -0.373443 | -2.520406 | -0.261867 |
| 6 | 2.030036  | -1.101742 | -0.040270 |
| 8 | 2.184060  | -2.425703 | -0.101365 |
| 1 | 1.283852  | -2.810143 | -0.184379 |
| 6 | 3.213994  | -0.319180 | 0.056977  |
| 6 | 4.539153  | -1.016276 | 0.089881  |
| 1 | 5.353963  | -0.300142 | 0.169355  |
| 1 | 4.588979  | -1.705506 | 0.933347  |
| 1 | 4.679487  | -1.614571 | -0.810888 |
| 6 | 3.103051  | 1.042856  | 0.112666  |
| 1 | 3.986880  | 1.662495  | 0.184515  |
| 6 | 1.852169  | 1.691391  | 0.076081  |
| 8 | 1.846619  | 3.022127  | 0.130878  |
| 1 | 0.908642  | 3.305564  | 0.094225  |
| 6 | 0.787885  | -0.483475 | -0.069066 |
| 6 | 0.692870  | 0.927661  | -0.013497 |

### **Geometry for the transition state:**

31

compound 2

|   |           |           |           |
|---|-----------|-----------|-----------|
| 6 | -0.601366 | 1.610383  | -0.036000 |
| 8 | -0.724702 | 2.833884  | 0.013717  |
| 6 | -1.820933 | 0.738958  | -0.122822 |
| 8 | -2.921807 | 1.473727  | -0.153895 |
| 6 | -4.225696 | 0.918877  | -0.020501 |
| 1 | -4.482817 | 0.298369  | -0.873994 |
| 1 | -4.307153 | 0.338232  | 0.898109  |
| 1 | -4.886495 | 1.778938  | 0.034455  |
| 6 | -1.708841 | -0.620185 | -0.176936 |
| 8 | -2.790171 | -1.422184 | -0.360416 |
| 6 | -3.120138 | -2.280459 | 0.728436  |
| 1 | -2.303864 | -2.964330 | 0.952464  |
| 1 | -3.367023 | -1.690357 | 1.615439  |
| 1 | -3.993804 | -2.843779 | 0.412687  |
| 6 | -0.390854 | -1.241081 | -0.159306 |
| 8 | -0.299708 | -2.510902 | -0.242923 |
| 6 | 1.996848  | -1.129755 | -0.049663 |
| 8 | 2.047328  | -2.404897 | -0.121553 |
| 1 | 0.833305  | -2.806699 | -0.217402 |
| 6 | 3.210774  | -0.339692 | 0.047658  |
| 6 | 4.519523  | -1.060657 | 0.069282  |
| 1 | 5.352674  | -0.365305 | 0.145206  |
| 1 | 4.555009  | -1.755839 | 0.908807  |
| 1 | 4.635310  | -1.661630 | -0.833352 |
| 6 | 3.108374  | 1.014229  | 0.109859  |
| 1 | 3.996472  | 1.629063  | 0.179809  |
| 6 | 1.851395  | 1.691934  | 0.083550  |
| 8 | 1.866080  | 3.016950  | 0.143032  |
| 1 | 0.927106  | 3.310634  | 0.111548  |
| 6 | 0.768246  | -0.454040 | -0.063970 |
| 6 | 0.683521  | 0.958165  | -0.002499 |

### **Geometry for the second minimum:**

31

compound 2

|   |           |           |           |
|---|-----------|-----------|-----------|
| 6 | -0.620604 | 1.579439  | 0.026471  |
| 8 | -0.740577 | 2.809120  | 0.112546  |
| 6 | -1.828546 | 0.716919  | -0.073991 |
| 8 | -2.945540 | 1.432199  | -0.071934 |
| 6 | -4.202636 | 0.888863  | -0.461015 |
| 1 | -4.123200 | 0.360752  | -1.408521 |
| 1 | -4.598681 | 0.217818  | 0.298777  |
| 1 | -4.855122 | 1.750841  | -0.566008 |
| 6 | -1.699478 | -0.640836 | -0.137208 |
| 8 | -2.777485 | -1.465960 | -0.234133 |
| 6 | -3.109739 | -2.148799 | 0.970948  |
| 1 | -2.283360 | -2.773738 | 1.309184  |
| 1 | -3.378524 | -1.433342 | 1.752855  |
| 1 | -3.966408 | -2.775252 | 0.738161  |
| 6 | -0.387346 | -1.253026 | -0.162866 |
| 8 | -0.360933 | -2.561621 | -0.262832 |
| 6 | 2.044667  | -1.144209 | -0.095020 |
| 8 | 2.160868  | -2.383037 | -0.185500 |
| 1 | 0.597227  | -2.844824 | -0.265660 |
| 6 | 3.243195  | -0.289843 | 0.004211  |
| 6 | 4.570331  | -0.973155 | -0.010809 |
| 1 | 5.384917  | -0.256638 | 0.069812  |
| 1 | 4.635910  | -1.688063 | 0.810010  |
| 1 | 4.687011  | -1.550116 | -0.928782 |
| 6 | 3.101117  | 1.048488  | 0.101339  |
| 1 | 3.965134  | 1.696675  | 0.173575  |
| 6 | 1.811527  | 1.684406  | 0.111672  |
| 8 | 1.790122  | 2.998098  | 0.206919  |
| 1 | 0.829827  | 3.259749  | 0.196639  |
| 6 | 0.767065  | -0.493291 | -0.079843 |
| 6 | 0.659387  | 0.926000  | 0.022681  |

## Compound II – scan 1 (PBE functional)

### Geometry for the first minimum:

31

compound 2

|   |           |           |           |
|---|-----------|-----------|-----------|
| 6 | -0.597051 | 1.596566  | -0.057268 |
| 8 | -0.694349 | 2.850597  | -0.020207 |
| 6 | -1.827453 | 0.758278  | -0.123284 |
| 8 | -2.931785 | 1.518949  | -0.156279 |
| 6 | -4.238300 | 0.979505  | 0.122570  |
| 1 | -4.588145 | 0.335661  | -0.690581 |
| 1 | -4.234391 | 0.419762  | 1.067687  |
| 1 | -4.880889 | 1.860817  | 0.218526  |
| 6 | -1.739026 | -0.622285 | -0.167303 |
| 8 | -2.860704 | -1.375408 | -0.380952 |
| 6 | -3.169341 | -2.388973 | 0.602949  |
| 1 | -2.343538 | -3.099563 | 0.711603  |
| 1 | -3.400829 | -1.915006 | 1.570443  |
| 1 | -4.060030 | -2.900647 | 0.223743  |
| 6 | -0.430439 | -1.290847 | -0.150369 |
| 8 | -0.358084 | -2.552394 | -0.242932 |
| 6 | 2.034647  | -1.111431 | -0.026738 |
| 8 | 2.152638  | -2.443679 | -0.085255 |
| 1 | 1.187538  | -2.776142 | -0.166935 |
| 6 | 3.233888  | -0.329353 | 0.062353  |
| 6 | 4.557448  | -1.033646 | 0.095920  |
| 1 | 5.384497  | -0.318314 | 0.167030  |
| 1 | 4.610250  | -1.726061 | 0.948561  |
| 1 | 4.694847  | -1.649009 | -0.805004 |
| 6 | 3.125618  | 1.047877  | 0.106996  |
| 1 | 4.019380  | 1.669632  | 0.172596  |
| 6 | 1.866996  | 1.702069  | 0.065411  |
| 8 | 1.829721  | 3.037853  | 0.105004  |
| 1 | 0.834969  | 3.264596  | 0.063733  |
| 6 | 0.775510  | -0.481958 | -0.055167 |
| 6 | 0.686977  | 0.932018  | -0.015479 |

### **Geometry for the transition state:**

31

compound 2

|   |           |           |           |
|---|-----------|-----------|-----------|
| 6 | -0.579598 | 1.556632  | -0.070230 |
| 8 | -0.656827 | 2.852635  | -0.037091 |
| 6 | -1.804844 | 0.757063  | -0.132146 |
| 8 | -2.914356 | 1.517759  | -0.171810 |
| 6 | -4.200946 | 0.991685  | 0.207725  |
| 1 | -4.609573 | 0.334469  | -0.566467 |
| 1 | -4.133130 | 0.449760  | 1.161067  |
| 1 | -4.832229 | 1.877767  | 0.331609  |
| 6 | -1.723701 | -0.632303 | -0.174843 |
| 8 | -2.858272 | -1.359237 | -0.397909 |
| 6 | -3.167797 | -2.413363 | 0.543486  |
| 1 | -2.354279 | -3.143511 | 0.599972  |
| 1 | -3.368035 | -1.980937 | 1.536836  |
| 1 | -4.077810 | -2.885957 | 0.159676  |
| 6 | -0.423649 | -1.310772 | -0.144458 |
| 8 | -0.338364 | -2.578408 | -0.228173 |
| 6 | 2.035257  | -1.104210 | -0.017361 |
| 8 | 2.160222  | -2.429425 | -0.069736 |
| 1 | 1.183977  | -2.766002 | -0.150091 |
| 6 | 3.236014  | -0.300153 | 0.071201  |
| 6 | 4.561444  | -1.000829 | 0.112351  |
| 1 | 5.385550  | -0.282187 | 0.181849  |
| 1 | 4.613360  | -1.688445 | 0.968878  |
| 1 | 4.702825  | -1.620608 | -0.784918 |
| 6 | 3.120353  | 1.070398  | 0.107426  |
| 1 | 4.009220  | 1.699539  | 0.172505  |
| 6 | 1.841464  | 1.733956  | 0.057774  |
| 8 | 1.734702  | 3.019202  | 0.085594  |
| 1 | 0.431380  | 3.226496  | 0.024850  |
| 6 | 0.770517  | -0.496091 | -0.051551 |
| 6 | 0.674136  | 0.914555  | -0.023168 |

### **Geometry for the second minimum:**

31

compound 2

|   |           |           |           |
|---|-----------|-----------|-----------|
| 6 | -0.585233 | 1.553709  | -0.075374 |
| 8 | -0.700485 | 2.867264  | -0.045739 |
| 6 | -1.801904 | 0.756709  | -0.136665 |
| 8 | -2.917646 | 1.511188  | -0.181041 |
| 6 | -4.191368 | 0.987009  | 0.242287  |
| 1 | -4.621893 | 0.321628  | -0.512890 |
| 1 | -4.093959 | 0.454454  | 1.198405  |
| 1 | -4.820718 | 1.873019  | 0.376657  |
| 6 | -1.720728 | -0.634396 | -0.177945 |
| 8 | -2.856837 | -1.357254 | -0.402758 |
| 6 | -3.161036 | -2.425726 | 0.524363  |
| 1 | -2.352849 | -3.163208 | 0.555294  |
| 1 | -3.341603 | -2.009892 | 1.528402  |
| 1 | -4.081365 | -2.882667 | 0.146257  |
| 6 | -0.422678 | -1.303165 | -0.142727 |
| 8 | -0.328374 | -2.575591 | -0.223663 |
| 6 | 2.026309  | -1.100511 | -0.015722 |
| 8 | 2.137277  | -2.421294 | -0.067804 |
| 1 | 1.141730  | -2.747502 | -0.148100 |
| 6 | 3.240057  | -0.308062 | 0.073973  |
| 6 | 4.556181  | -1.025294 | 0.117248  |
| 1 | 5.388681  | -0.316568 | 0.188003  |
| 1 | 4.597757  | -1.713540 | 0.973777  |
| 1 | 4.690873  | -1.646822 | -0.779798 |
| 6 | 3.134874  | 1.058191  | 0.108382  |
| 1 | 4.026984  | 1.682993  | 0.173944  |
| 6 | 1.859132  | 1.749852  | 0.056617  |
| 8 | 1.786767  | 3.021896  | 0.083139  |
| 1 | 0.281480  | 3.228364  | 0.010795  |
| 6 | 0.764795  | -0.482569 | -0.050580 |
| 6 | 0.671476  | 0.932598  | -0.025160 |



## Compound II – scan 2 (PBE functional)

### Geometry for the first minimum:

31

compound 2

|   |           |           |           |
|---|-----------|-----------|-----------|
| 6 | -0.597051 | 1.596566  | -0.057268 |
| 8 | -0.694349 | 2.850597  | -0.020207 |
| 6 | -1.827453 | 0.758278  | -0.123284 |
| 8 | -2.931785 | 1.518949  | -0.156279 |
| 6 | -4.238300 | 0.979505  | 0.122570  |
| 1 | -4.588145 | 0.335661  | -0.690581 |
| 1 | -4.234391 | 0.419762  | 1.067687  |
| 1 | -4.880889 | 1.860817  | 0.218526  |
| 6 | -1.739026 | -0.622285 | -0.167303 |
| 8 | -2.860704 | -1.375408 | -0.380952 |
| 6 | -3.169341 | -2.388973 | 0.602949  |
| 1 | -2.343538 | -3.099563 | 0.711603  |
| 1 | -3.400829 | -1.915006 | 1.570443  |
| 1 | -4.060030 | -2.900647 | 0.223743  |
| 6 | -0.430439 | -1.290847 | -0.150369 |
| 8 | -0.358084 | -2.552394 | -0.242932 |
| 6 | 2.034647  | -1.111431 | -0.026738 |
| 8 | 2.152638  | -2.443679 | -0.085255 |
| 1 | 1.187538  | -2.776142 | -0.166935 |
| 6 | 3.233888  | -0.329353 | 0.062353  |
| 6 | 4.557448  | -1.033646 | 0.095920  |
| 1 | 5.384497  | -0.318314 | 0.167030  |
| 1 | 4.610250  | -1.726061 | 0.948561  |
| 1 | 4.694847  | -1.649009 | -0.805004 |
| 6 | 3.125618  | 1.047877  | 0.106996  |
| 1 | 4.019380  | 1.669632  | 0.172596  |
| 6 | 1.866996  | 1.702069  | 0.065411  |
| 8 | 1.829721  | 3.037853  | 0.105004  |
| 1 | 0.834969  | 3.264596  | 0.063733  |
| 6 | 0.775510  | -0.481958 | -0.055167 |
| 6 | 0.686977  | 0.932018  | -0.015479 |

### **Geometry for the transition state:**

31

compound 2

|   |           |           |           |
|---|-----------|-----------|-----------|
| 6 | -0.596088 | 1.610750  | -0.047943 |
| 8 | -0.688330 | 2.870861  | -0.006335 |
| 6 | -1.816189 | 0.763890  | -0.122883 |
| 8 | -2.928872 | 1.510919  | -0.159606 |
| 6 | -4.237157 | 0.955817  | 0.074869  |
| 1 | -4.553995 | 0.312562  | -0.752214 |
| 1 | -4.258060 | 0.391953  | 1.017317  |
| 1 | -4.891965 | 1.829686  | 0.154282  |
| 6 | -1.716401 | -0.623578 | -0.170015 |
| 8 | -2.829817 | -1.394736 | -0.382395 |
| 6 | -3.146394 | -2.365408 | 0.640001  |
| 1 | -2.314699 | -3.059963 | 0.802089  |
| 1 | -3.404879 | -1.853406 | 1.580902  |
| 1 | -4.020029 | -2.909833 | 0.266784  |
| 6 | -0.410526 | -1.253049 | -0.143927 |
| 8 | -0.314425 | -2.552680 | -0.233177 |
| 6 | 2.021409  | -1.139182 | -0.033621 |
| 8 | 2.079816  | -2.428365 | -0.101292 |
| 1 | 0.807767  | -2.783131 | -0.196516 |
| 6 | 3.236482  | -0.337315 | 0.056146  |
| 6 | 4.551993  | -1.050391 | 0.080657  |
| 1 | 5.388726  | -0.346371 | 0.153243  |
| 1 | 4.595650  | -1.751816 | 0.926597  |
| 1 | 4.674911  | -1.664455 | -0.823453 |
| 6 | 3.129167  | 1.034084  | 0.107073  |
| 1 | 4.022553  | 1.657561  | 0.171528  |
| 6 | 1.864754  | 1.700122  | 0.073948  |
| 8 | 1.828115  | 3.030028  | 0.117184  |
| 1 | 0.821577  | 3.253724  | 0.078052  |
| 6 | 0.765924  | -0.467277 | -0.050697 |
| 6 | 0.679781  | 0.944082  | -0.005884 |

### **Geometry for the second minimum:**

31

compound 2

|   |           |           |           |
|---|-----------|-----------|-----------|
| 6 | -0.596980 | 1.602310  | -0.043332 |
| 8 | -0.684883 | 2.866207  | 0.002505  |
| 6 | -1.816032 | 0.762331  | -0.121269 |
| 8 | -2.928181 | 1.510173  | -0.157548 |
| 6 | -4.242528 | 0.952478  | 0.030465  |
| 1 | -4.530767 | 0.312569  | -0.809618 |
| 1 | -4.295564 | 0.384915  | 0.969353  |
| 1 | -4.900501 | 1.825449  | 0.091158  |
| 6 | -1.713430 | -0.626127 | -0.168649 |
| 8 | -2.825636 | -1.404183 | -0.370770 |
| 6 | -3.152047 | -2.338607 | 0.681141  |
| 1 | -2.322615 | -3.027993 | 0.875879  |
| 1 | -3.418956 | -1.795717 | 1.602164  |
| 1 | -4.021740 | -2.896721 | 0.319018  |
| 6 | -0.411430 | -1.251636 | -0.148481 |
| 8 | -0.340342 | -2.567706 | -0.245281 |
| 6 | 2.037456  | -1.149209 | -0.040452 |
| 8 | 2.118840  | -2.424345 | -0.110067 |
| 1 | 0.696628  | -2.797222 | -0.215034 |
| 6 | 3.248004  | -0.324127 | 0.053821  |
| 6 | 4.567994  | -1.027169 | 0.076696  |
| 1 | 5.400062  | -0.317779 | 0.150822  |
| 1 | 4.615133  | -1.730960 | 0.920499  |
| 1 | 4.693612  | -1.639513 | -0.828181 |
| 6 | 3.129758  | 1.042613  | 0.109695  |
| 1 | 4.015828  | 1.676443  | 0.176589  |
| 6 | 1.856260  | 1.696935  | 0.078855  |
| 8 | 1.807579  | 3.022532  | 0.126426  |
| 1 | 0.788808  | 3.235066  | 0.086883  |
| 6 | 0.767429  | -0.480861 | -0.055022 |
| 6 | 0.675721  | 0.932740  | -0.003744 |

## References:

- [1] Rodríguez, J.G.; Smith-Verdier, P.; Florencio, F.; García-Blanco, S. Crystal and molecular structure of 2,3-dimethylnaphthazarin: a charge-transfer complex. *J. Mol. Struct.* **1984**, *112*, 101-109.
- [2] Cannon, J.R.; Matsuki, Y.; Patrick, V.A.; White, A.H. Selective O-Demethylation of 5,8-Dihydroxy-2,3-dimethoxy-6-methylnaphtho-1,4-quinone. The Crystal Structures of 5,8-Dihydroxy-2,3-dimethoxy-6-methylnaphtho-1,4-quinone and 2,5,8-Triacetoxo-3-methoxy-6-methylnaphtho-1,4-quinone. *Aust. J. Chem.* **1987**, *40*, 1191-200.
- [3] Frisch, M.J.; Trucks, G.W.; Schlegel, H.B.; Scuseria, G.E.; Robb, M.A.; Cheeseman, J.R.; Scalmani, G.; Barone, V.; Petersson, G.A.; Nakatsuji, H.; Li, X.; Caricato, M.; Marenich, A.V.; Bloino, J.; Janesko, B.G.; Gomperts, R.; Mennucci, B.; Hratchian, H.P.; Ortiz, J.V.; Izmaylov, A.F.; Sonnenberg, J.L.; Williams-Young, D.; Ding, F.; Lipparini, F.; Egidi, F.; Goings, J.; Peng, B.; Petrone, A.; Henderson, T.; Ranasinghe, D.; Zakrzewski, V.G.; Gao, J.; Rega, N.; Zheng, G.; Liang, W.; Hada, M.; Ehara, M.; Toyota, K.; Fukuda, R.; Hasegawa, J.; Ishida, M.; Nakajima, T.; Honda, Y.; Kitao, O.; Nakai, H.; Vreven, T.; Throssell, K.; Montgomery, Jr., J.A.; Peralta, J.E.; Ogliaro, F.; Bearpark, M.J.; Heyd, J.J.; Brothers, E.N.; Kudin, K.N.; Staroverov, V.N.; Keith, T.A.; Kobayashi, R.; Normand, J.; Raghavachari, K.; Rendell, A.P.; Burant, J.C.; Iyengar, S.S.; Tomasi, J.; Cossi, M.; Millam, J.M.; Klene, M.; Adamo, C.; Cammi, R.; Ochterski, J.W.; Martin, R.L.; Morokuma, K.; Farkas, O.; Foresman, J.B.; Fox, D.J. Gaussian~16 Revision A.03, 2016. Gaussian Inc. Wallingford CT.
